# Supplementary material
Source: MDPI journal article supplement (https://www.mdpi.com/2076-3417/13/14/8503)
Supplement: s1 [file s1]

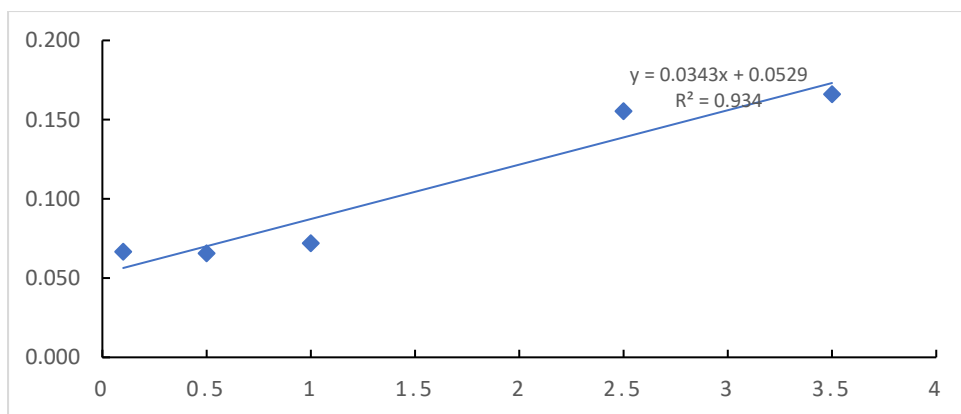

Supplementary **Figure S1**. Standard curve for total phenolics

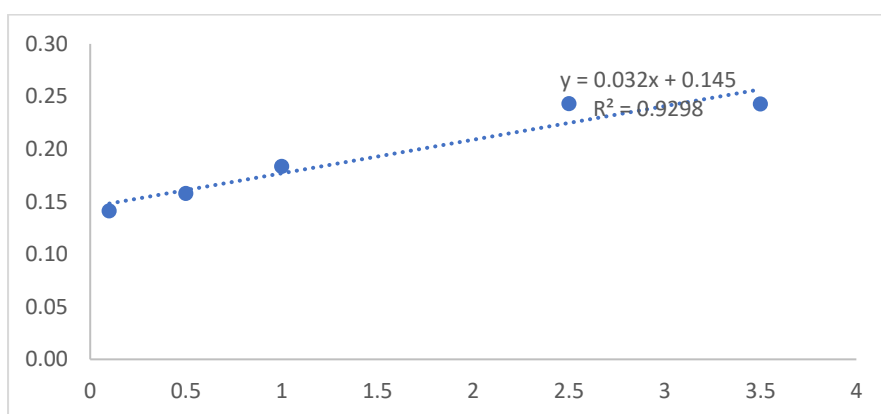

Supplementary **Figure S2**. Standard curve for total flavonoid content



**Supplementary Figure S3.** Chromatograms for spider plant (A) (1 = Citric acid; 2 = Uridine; 3 = Crotonoside; 4 = Quercetin 3-(2G-rhamnosylrutinoside); 5 = Quercetin 3,4-di-O-glucoside; 6 = Quercetin 3-O-rutinoside; 7 = Quercetin 3'-glucoside; 8 = Kaempferol 3-O-rutinoside; 9 = Quercetin), swiss chard (B) (1 = Crotonoside; 2 = Apiin; 3 = Isorhamnetin-3,4'-diglucoside; 4 = Vicenin-1 6"-O-acetate; 5 = Apigenin 7-6"-malonyl neohesperidoside; pumpkin (C) (1 = sucrose; 2 = 3-desmethyl 5-deshydroxy seleroin; 3 = 8-hydroxy-2-deoxy guanosine; 4 = Quercetin 3-methyl ether; 5 = P-Hydroxyphenyl butazone; 6 = Rutin/quercetin-3-O-rutinoside; 7 = Quercetin 3'-glucoside), cowpea (D) (1 = sucrose; 2 = 8-hydroxy-2-deoxy guanosine; 3 = Quercetin 3-methyl ether; 4 = Rutin/quercetin-3-O-rutinoside; 5 = Chartreusin ; 6 = Quercetin 3'-glucoside), and jute mallow (E) (1 = 8-hydroxy-2-deoxy guanosine ; 2 = Isoquercetin; 3 = Quercetin 3'-glucoside).
